# Supplementary material for: Lifestyle Factors Influencing Metabolic Syndrome after Adjusting for Socioeconomic Status and Female Reproductive Health Indicators: A National Representative Survey in Korean Pre- and Postmenopausal Women
Source: MDPI journal article supplement (doi:10.3390/healthcare12080821), 2024-04-12
Supplement: s1 [file s1]

Supplementary material

Table S1. Adjusted odds ratio of socioeconomic status, female reproductive health indicators, lifestyle factors, and metabolic syndrome among premenopausal women.

| Variables                          | Categories            | OR (95% CI)            | <i>p</i> |
|------------------------------------|-----------------------|------------------------|----------|
| Socioeconomic status               |                       |                        |          |
| Age                                | -                     | 1.018 (0.971-1.067)    | .464     |
| Education                          | Middle school or less | 1.262 (0.661-2.410)    | .481     |
|                                    | High school           | 1.145 (0.796-1.646)    | .465     |
|                                    | College or higher     | 1                      |          |
| Household income                   | First quintile        | 2.709 (1.064-4.064)    | .032     |
|                                    | Second quintile       | 1.107 (0.672-1.823)    | .064     |
|                                    | Third quintile        | 1.126 (0.709-1.789)    | .690     |
|                                    | Fourth quintile       | 1.029 (0.919-1.151)    | .615     |
|                                    | Fifth quintile        | 1                      |          |
| Female reproductive health         |                       |                        |          |
| Age of menarche                    | -                     | 1.029 (0.919-1.151)    | .623     |
| Lifestyle facators                 |                       |                        |          |
| Total calories (kcal/day)          | -                     | 1.000 (0.999-1.001)    | .498     |
| Total fats (g/day)                 | -                     | 1.006 (0.984-1.029)    | .588     |
| Total proteins (g/day)             | -                     | 0.998 (0.975-1.021)    | .862     |
| Percentage energy of carbohydrates | -                     | 1.024 (0.995-1.055)    | .110     |
| Percentage energy of fats          | -                     | 0.991 (0.936-1.050)    | .769     |
| Percentage energy of proteins      | -                     | 1.020 (0.918-1.134)    | .713     |
| Smoking                            | Current smoker        | 4.462 (2.307-8.628)    | .000     |
|                                    | Ex-smoker             | 1.207 (0. 629-2.317)   | .571     |
|                                    | Non-smoker            | 1                      |          |
| High-risk drinking                 | Yes                   | 1.170 (0.596-2.299)    | .648     |
|                                    | No                    | 1                      |          |
| Regular physical exercise          | Yes                   | 1                      |          |
|                                    | No                    | 1.107 (0.801-1.531)    | .538     |
| Obesity                            | Underweight           | 0.398 (0.051-3.081)    | .378     |
|                                    | Normal                | 1                      |          |
|                                    | Overweight            | 3.965 (2.325-6.763)    | .000     |
|                                    | Obese                 | 21.158 (13.511-33.136) | .000     |

Table S2. Adjusted odds ratio of socioeconomic status, female reproductive health indicators, lifestyle factors, and metabolic syndrome among postmenopausal women.

| Variables                          | Categories            | OR (95% CI)           | <i>p</i> |
|------------------------------------|-----------------------|-----------------------|----------|
| Socioeconomic status               |                       |                       |          |
| Age                                | -                     | 0.979 (0.929-1.031)   | .416     |
| Education                          | Middle school or less | 1.267 (0.781-2.055)   | .338     |
|                                    | High school           | 0.908 (0.584-1.413)   | .670     |
|                                    | College or higher     | 1                     |          |
| Household income                   | First quintile        | 1.391 (0.749-2.583)   | .297     |
|                                    | Second quintile       | 1.155 (0.701-1.905)   | .571     |
|                                    | Third quintile        | 1.263 (0.786-2.030)   | .335     |
|                                    | Fourth quintile       | 1.021 (0.928-1.123)   | .852     |
|                                    | Fifth quintile        | 1                     |          |
| Female reproductive health         |                       |                       |          |
| Age of menarche                    | -                     | 1.021 (0.928-1.123)   | .667     |
| Lifestyle facators                 |                       |                       |          |
| Total calories (kcal/day)          | -                     | 1.000 (0.999-1.001)   | .906     |
| Total fats (g/day)                 | -                     | 0.984 (0.957-1.012)   | .251     |
| Total proteins (g/day)             | -                     | 1.006 (0.987-1.025)   | .556     |
| Percentage energy of carbohydrates | -                     | 0.991 (0.963-1.020)   | .536     |
| Percentage energy of fats          | -                     | 1.012 (0.951-1.077)   | .712     |
| Percentage energy of proteins      | -                     | 0.943 (0.853-1.043)   | .253     |
| Smoking                            | Current smoker        | 1.154 (0.516-2.579)   | .728     |
|                                    | Ex-smoker             | 1.045 (0.456-2.392)   | .917     |
|                                    | Non-smoker            | 1                     |          |
| High-risk drinking                 | Yes                   | 0.834(0.344-2.024)    | .688     |
|                                    | No                    | 1                     |          |
| Regular physical exercise          | Yes                   | 1                     |          |
|                                    | No                    | 1.459 (1.049-2.029)   | .025     |
| Obesity                            | Underweight           | 0.348 (0.046-2.641)   | .308     |
|                                    | Normal                | 1                     |          |
|                                    | Overweight            | 3.242 (2.050-5.128)   | .000     |
|                                    | Obese                 | 11.282 (7.481-17.013) | .000     |
